# Supplementary material for: Whole genome sequencing of cyanobacterium Nostoc sp. CCCryo 231-06 using microfluidic single cell technology
Source: PubMed Central journal article supplement — iScience. 2022 Apr 25;25(5):104291. doi: 10.1016/j.isci.2022.104291 (PMC9095746; doi:10.1016/j.isci.2022.104291), 2022-04-25
Supplement: mmc1.pdf [file mmc1.pdf]

**Supplemental information**

**Whole genome sequencing of cyanobacterium**

***Nostoc* sp. CCCryo 231-06 using microfluidic**

**single cell technology**

**Yuguang Liu, Patricio Jeraldo, William Herbert, Samantha McDonough, Bruce Eckloff, Dirk Schulze-Makuch, Jean-Pierre de Vera, Charles Cockell, Thomas Leya, Mickael Baqué, Jin Jen, and Marina Walther-Antonio**

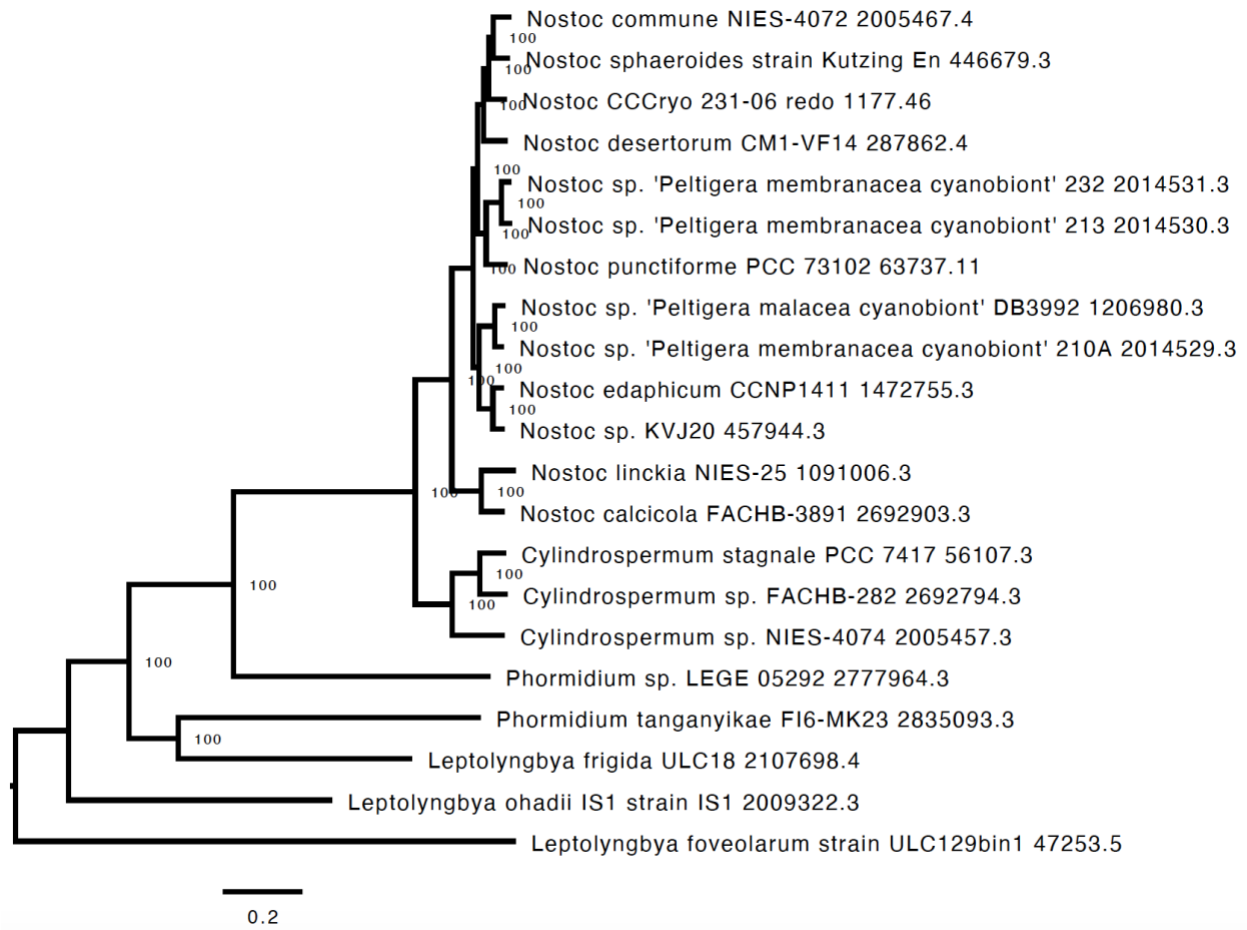

**Figure S1.** All 1000 genes in Nostoc – Related to Phylogenetic tree building in Methods Details.
